# Supplementary material for: Disruption of Bacterial Thiol-Dependent Redox Homeostasis by Magnolol and Honokiol as an Antibacterial Strategy
Source: MDPI journal article supplement (doi:10.3390/antiox12061180), 2023-05-30
Supplement: s1 [file s1]

**Supplementary Table S1. MIC value of traditional Chinese medicines against various bacteria**

| MIC (mg/ml)                            | <i>E. coli</i> WT | <i>E. coli</i> $\Delta$ oxyR | <i>S. aureus</i> | <i>S. epidermidis</i> | <i>B. subtilis</i> | <i>B. cereus</i> |
|----------------------------------------|-------------------|------------------------------|------------------|-----------------------|--------------------|------------------|
| Ginger Magnoliae<br>Officinalis Cortex | -                 | 0.78                         | 0.78             | 0.78                  | 0.78               | 0.78             |
| Cirsii Herba                           | -                 | 1.56                         | -                | -                     | -                  | -                |
| Trberculate<br>Speranskia Herb         | -                 | 6.25                         | -                | -                     | -                  | -                |
| Viola Herba                            | -                 | 3.13                         | -                | -                     | -                  | -                |
| Genkwa flos                            | -                 | 3.13                         | -                | -                     | -                  | -                |
| Ligustri Lucidi<br>Fructus             | -                 | 3.13                         | -                | -                     | -                  | -                |
| Cynanchi Atrati<br>Radix Et Rhizoma    | -                 | 3.13                         | -                | -                     | -                  | -                |
| Sinomenii Caulis                       | -                 | 3.13                         | 12.50            | 12.50                 | 12.50              | 12.50            |
| Plantaginis Herba                      | -                 | 0.78                         | -                | -                     | -                  | -                |
| Lonicerae<br>Japonicae Caulis          | -                 | 6.25                         | -                | -                     | -                  | -                |
| Leonuri Fructus                        | -                 | 6.25                         | -                | -                     | -                  | -                |
| Drynariae<br>Rhizoma                   | -                 | 6.25                         | -                | -                     | -                  | -                |
| Zingiberis<br>Rhizoma<br>Praeparatum   | -                 | 3.13                         | -                | -                     | -                  | -                |
| Taraxaci Herba                         | -                 | 1.56                         | -                | -                     | -                  | -                |
| Scutellariae<br>Barbatae Herba         | -                 | 0.78                         | 1.56             | 1.56                  | 3.13               | 3.13             |
| Viticis Fructus                        | -                 | 3.13                         | -                | -                     | -                  | -                |
| Piperis Kadsurae<br>Caulis             | -                 | 3.13                         | -                | -                     | -                  | -                |
| Faeces<br>Trogopterpri                 | -                 | 12.50                        | -                | -                     | -                  | -                |
| Sennae Folium                          | -                 | 6.25                         | -                | -                     | -                  | -                |
| Dendrobii Caulis                       | -                 | 6.25                         | -                | -                     | -                  | -                |

|                                    |   |       |       |       |       |       |
|------------------------------------|---|-------|-------|-------|-------|-------|
| Clematidis Radix<br>Et Rhizoma     | - | 6.25  | -     | -     | -     | -     |
| Epimedii Folium                    | - | 3.13  | -     | -     | -     | -     |
| Hedyotis Herba                     | - | 6.25  | -     | -     | -     | -     |
| Glycyrrhizae<br>Radix Et Rhizoma   | - | 3.13  | 3.13  | 3.13  | 3.13  | 3.13  |
| Thlaspis Herba                     | - | 3.125 | 12.50 | 12.50 | 12.50 | 12.50 |
| Chrysanthemi<br>Flos               | - | 12.50 | -     | -     | -     | -     |
| Mori Folium                        | - | 3.13  | -     | -     | -     | -     |
| Lotus Flower                       | - | 1.56  | 12.50 | 12.50 | 12.50 | 12.50 |
| Carthami Flos                      | - | 1.56  | 6.25  | 6.25  | 6.25  | 6.25  |
| Magnoliae Flos                     | - | 6.25  | -     | -     | -     | -     |
| Cacumen<br>Platycladi              | - | 1.56  | -     | -     | -     | -     |
| Cirsii Japonici<br>Herba           | - | 3.13  | -     | -     | -     | -     |
| Girald<br>Acanthopanax<br>Cortex   | - | 3.13  | -     | -     | -     | -     |
| Menthae<br>Haplocalycis<br>Herba   | - | 0.78  | 12.50 | 12.50 | 12.50 | 12.50 |
| Siegesbeckiae<br>Herba             | - | 1.56  | -     | -     | -     | -     |
| Prunellae Spica                    | - | 0.78  | 3.13  | 3.13  | 3.13  | 3.13  |
| Inulae Herba                       | - | 1.56  | 12.50 | 12.50 | 12.50 | 12.50 |
| Mori Cortex                        | - | -     | 1.56  | 1.56  | 3.13  | 3.13  |
| Schizonepetae<br>Herba Carbonisata | - | 0.78  | 3.13  | 3.13  | 3.13  | 3.13  |

:- Bacterial growth was not inhibited at a maximum concentration of 12.50 mg/ml. *E. coli* WT: *E. coli* DHB4 strain. *E. coli*  $\Delta oxyR$ : *E. coli* DHB4 strain with *oxyR* gene deletion.

**Supplementary Table S2. MBC value of magnolol and honokiol against bacteria (µg/ml)**

| Bacterial type         | Bacteria                         | Magnolol | Honokiol |
|------------------------|----------------------------------|----------|----------|
| Gram-negative bacteria | <i>E. coli</i>                   | >332     | >332     |
|                        | <i>P. aeruginosa</i>             | >332     | >332     |
| Gram-positive bacteria | <i>S. aureus ATCC29213</i>       | 8        | 8        |
|                        | <i>S. aureus MRSA USA300 JE2</i> | 10       | 6        |
|                        | <i>S. epidermidis</i>            | 8        | 8        |
|                        | <i>B. cereus</i>                 | 8        | 8        |
|                        | <i>B. subtilis</i>               | 8        | 8        |

The diluted bacteria were cultured with magnolol or honokiol in a 96-well plate at 37°C for 24 h. The bacteria include Gram-negative bacteria (*E. coli*, *P. aeruginosa*) and Gram-positive bacteria (*S. aureus*, *S. epidermidis*, *B. subtilis*, *B. cereus*) which were cultured to an OD600 ~0.4 and diluted 1,000 times. Whereafter, the MBC values were determined in triplicates using LB-agar medium plate.
